# Supplementary material for: A single fluorescent probe for multiple analyte sensing: efficient and selective detection of CN−, HSO3−and extremely alkaline pH
Source: Royal Society of Chemistry journal article supplement (doi:10.1039/c6tb00119j), 2016-01-01
Supplement: c6tb00119j1.pdf [file c6tb00119j1.pdf]

1

## **Electronic Supplementary Information**

2

3 Single Fluorescent Probe for the Multiple Analyte Sensing: Efficient and  
4 Selective Detection of  $\text{CN}^-$ ,  $\text{HSO}_3^-$  and extremely alkaline pH

5 *Jianbin Chao,\*<sup>a</sup> Zhiqing Li,<sup>a,b</sup> Yongbin Zhang,<sup>a</sup> Fangjun Huo,<sup>a</sup> Caixia Yin,<sup>c</sup>*

6 *Yuhong Liu,<sup>a,b</sup> Yingqi Li<sup>b</sup> and Juanjuan Wang<sup>d</sup>*

7

8 <sup>a</sup>Research Institute of Applied Chemistry, Shanxi University, Taiyuan 030006, P.R. China

9 <sup>b</sup>School of Chemistry and Chemical Engineering, Shanxi University, Taiyuan 030006, China

10 <sup>c</sup>Institute of Molecular Science, Shanxi University, Taiyuan, 030006, China

11 <sup>d</sup>Scientific Instrument Center, Shanxi University, Taiyuan, 030006, China

12

13

### **14 Contents:**

15 **1. The solvent dependence in the detection process of  $\text{CN}^-$**

16 **2. Cell cytotoxicity assay**

17 **3. Culture of HeLa cells for intracellular imaging**

18 **4. Supplementary figures**

19 **Figures S1.** ESIMS analysis of **IECBT**.

20 **Figures S2.** ESIMS analysis of **IECBT** in the present of  $\text{CN}^-$ .

21 **Figures S3.** ESIMS analysis of **IECBT** in the present of  $\text{HSO}_3^-$ .

22 **Figures S4.** Emission ratio  $I_{376}/I_{575}$  changes of **IECBT** ( $10\ \mu\text{M}$ ) in the absence or

23 presence of  $\text{CN}^-$  (35  $\mu\text{M}$ ) under different solvent conditions: (1) DMSO; (2)  
24 DMSO/ $\text{H}_2\text{O}$ , v/v, 4/1; (3) DMSO/ $\text{H}_2\text{O}$ , v/v, 3/2; (4) DMSO/ $\text{H}_2\text{O}$ , v/v, 2/3; (5)  
25 DMSO/ $\text{H}_2\text{O}$ , v/v, 1/4; (6)  $\text{H}_2\text{O}$ ; (7)  $\text{H}_2\text{O}/\text{CH}_3\text{CN}$ , v/v, 4/1; (8)  $\text{H}_2\text{O}/\text{CH}_3\text{CN}$ , v/v,  
26 3/2; (9)  $\text{H}_2\text{O}/\text{CH}_3\text{CN}$ , v/v, 2/3; (10)  $\text{H}_2\text{O}/\text{CH}_3\text{CN}$ , v/v, 1/4; (11)  $\text{CH}_3\text{CN}$ ;  $\lambda_{\text{ex}} =$   
27 340 nm. Slits: 10 nm/5 nm. Voltage = 500 V.

28 **Figures S5.** Time-depended fluorescent ratio  $I_{376}/I_{575}$  changes of **IECBT** (10  $\mu\text{M}$ ) in  
29 the absence and present of  $\text{CN}^-$  (17  $\mu\text{M}$ ).  $\lambda_{\text{ex}} = 340$  nm. Slits: 10 nm/5 nm.  
30 Voltage = 500 V.

31 **Figures S6.** Emission ratio  $I_{376}/I_{575}$  of **IECBT** (10  $\mu\text{M}$ ) in the presence of various  
32 anions (1 equiv. respectively) in DMSO.  $\lambda_{\text{ex}} = 340$  nm. Slits: 10 nm/5 nm.  
33 Voltage = 500 V.

34 **Figures S7.** Changes in fluorescence spectra of **IECBT** (10  $\mu\text{M}$ ) at 568 nm in the  
35 absence and present of  $\text{HSO}_3^-$  (20  $\mu\text{M}$ ) in water as a function of pH.  $\lambda_{\text{ex}} = 465$  nm.  
36 Slits: 10 nm/5 nm. Voltage = 600 V.

37 **Figures S8.** Time-depended fluorescent intensity changes at 568 nm of **IECBT** (10  
38  $\mu\text{M}$ ) in the absence and present of  $\text{HSO}_3^-$  (10 $\mu\text{M}$ ).  $\lambda_{\text{ex}} = 465$  nm. Slits: 10 nm/5  
39 nm. Voltage = 600 V.

40 **Figures S9.** The relative fluorescence intensity ratio  $(F_0-F) / F_0$  of **IECBT** (10  $\mu\text{M}$ ) at  
41 568 nm in the presence of various anions (1 equiv. respectively) in aqueous  
42 solution.  $\lambda_{\text{ex}} = 465$  nm. Slits: 10 nm/5 nm. Voltage = 600 V.

43 **Figures S10.** Time-depended fluorescent intensity changes at 568 nm of **IECBT** (10  
44  $\mu\text{M}$ ) at pH 6.44, 6.66, and 9.70, respectively.  $\lambda_{\text{ex}} = 465$  nm. Slits: 10 nm/5 nm.

45 Voltage = 600 V.

46 **Figures S11.** Cell cytotoxic effect of **IECBT** on HeLa cells. (1) control; (2) 0.1  $\mu\text{M}$ ; (3)  
47 1  $\mu\text{M}$ ; (4) 10  $\mu\text{M}$ . Data are expressed as mean values standard error of the mean  
48 of six independent experiments.

49 **Figures S12.** Cell cytotoxic effect of **IECBT** (10  $\mu\text{M}$ ) after upon addition of  $\text{CN}^-$  on  
50 HeLa cells.  $\text{CN}^-$  concentrations were varied as following: (1) control; (2) 0.01  $\mu\text{M}$ ;  
51 (3) 0.1  $\mu\text{M}$ ; (4) 1  $\mu\text{M}$ ; (5) 5  $\mu\text{M}$ ; (6) 30  $\mu\text{M}$ . Data are expressed as mean values  
52 standard error of the mean of six independent experiments.

53

#### 54 **1. The solvent dependence in the detection process of $\text{CN}^-$**

55 The solvent of a system is often considered as a significant influencing factor on interactions. The  
56 effect of different solvent conditions on the fluorescence properties of the system was investigated  
57 (Figure S4). From Figure S4, we could find that **IECBT** was stable and displayed the best  
58 response for  $\text{CN}^-$  in DMSO. So, in the subsequent UV-vis and fluorescence experiments, DMSO  
59 was selected as a testing system to investigate the spectral response of **IECBT** to  $\text{CN}^-$ .

#### 60 **2. Cell cytotoxicity assay**

61 An MTT assay was performed to test the cytotoxicity of **IECBT** as well as the cell viability after  
62 upon addition of  $\text{CN}^-$  on HeLa cells. HeLa cells were cultured in Dulbecco's Modified Eagle's  
63 Medium (DMEM) supplemented with 10% FBS (fetal bovine serum), 100  $\text{mg}\cdot\text{mL}^{-1}$  penicillin, and  
64 100  $\mu\text{g}\cdot\text{mL}^{-1}$  streptomycin in a 5%  $\text{CO}_2$ , water saturated incubator at 37  $^\circ\text{C}$ . Before the experiment,  
65 healthy HeLa cells ( $5 \times 10^3$ ) were plated into 96 well microtiter plates (Nunc) for 16 h, followed  
66 by the addition of different concentrations of **IECBT** (0 to 10  $\mu\text{M}$ ). The cells were then incubated

67 at 37 °C in an atmosphere of 5% CO<sub>2</sub> and 95% air for 24 h. After incubation, the solutions were  
68 aspirated and replaced by DMEM (180 μL), followed by the addition of 5 mg·mL<sup>-1</sup> MTT solution  
69 (20 μL, final concentration of 0.5 mg·mL<sup>-1</sup>) and incubated for 4 h. Unreacted dye was removed by  
70 aspiration; the insoluble formazan crystals were dissolved by adding dimethyl sulfoxide (200 μL)  
71 to each well and shaken for 10 min and measured spectrophotometrically in an ELISA reader at a  
72 wavelength of 490 nm. To evaluate the cytotoxicity of **IECBT** after upon addition of CN<sup>-</sup> on HeLa  
73 cells, the cells were also treated as previously described, except cells incubated with **IECBT** (10  
74 μM) for 30 minutes were treated with a varying concentrations of CN<sup>-</sup> (0, 0.01, 0.1, 1, 5, 30 μM)  
75 at 37 °C for 90 minutes. The cells were then washed with PBS (pH = 7.4), followed by analysis  
76 via MTT assays. Cells incubated with **IECBT** (10 μM) in a culture medium without CN<sup>-</sup> were  
77 used as the control. Each group had six samples, and the spectrophotometer was calibrated to zero  
78 absorbance using culture medium without cells. The relative cell viability (%) related to the  
79 control groups was calculated as follows:

$$80 \quad \text{Cell viability} = [A_{490}(\text{sample})/A_{490}(\text{control})] \times 100 \%$$

81 Where A<sub>490</sub> (sample) is the absorbance value of **IECBT** or **IECBT-CN** treated cells, and A<sub>490</sub>  
82 (control) is the absorbance value of cells as control groups.

### 83 **3. Culture of HeLa cells for intracellular imaging**

84 To observe the subcellular distribution of **IECBT**, about 1 × 10<sup>5</sup> HeLa cells in growth medium (2  
85 mL) were seeded on a 35 mm diameter round glass Petri dish and incubated for 48 h in a 5% CO<sub>2</sub>  
86 atmosphere. The medium was then removed. The cells were first incubated with **IECBT** (10 μM)  
87 dissolved in acetonitrile/water (4/6, v/v) for 30 min. The free **IECBT** was removed by washing the  
88 cells three times with PBS. The cells were then fixed with 4% paraformaldehyde (300 μL) for 8

89 minutes at room temperature and treated with DAPI ( $1 \text{ mg}\cdot\text{mL}^{-1}$ ) for an additional 15 min. The  
90 medium was removed and the cells were rinsed with PBS ( $\text{pH} = 7.4$ ) many times. Fluorescence  
91 images were collected on a ZEISS LSM 880 confocal laser scanning microscope with a  $200\times$   
92 objective lens. DAPI was excited at 405 nm and its blue emission was collected in the 425-475 nm  
93 detection range; **IECBT** was excited at 488 nm and its red emissions were collected in the 500-  
94 600 nm detection range.

95

96

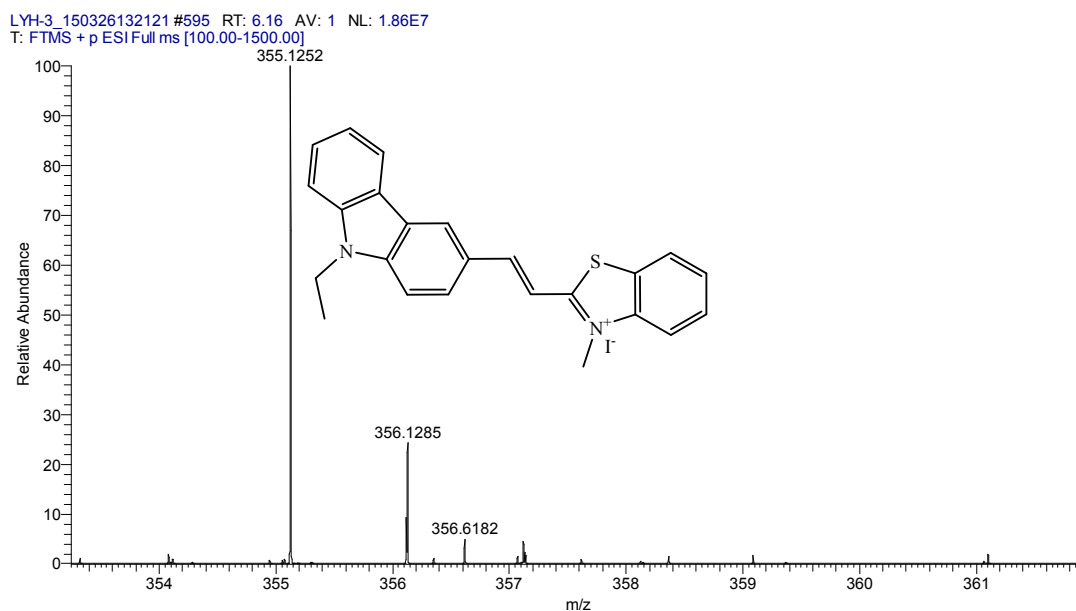

97

98 **Figures S1.** ESIMS analysis of **IECBT**.

99

100

LYH-5\_150327031744 #339 RT: 4.31 AV: 1 NL: 8.95E5  
T: FTMS + p ESI Full ms [100.00-1500.00]

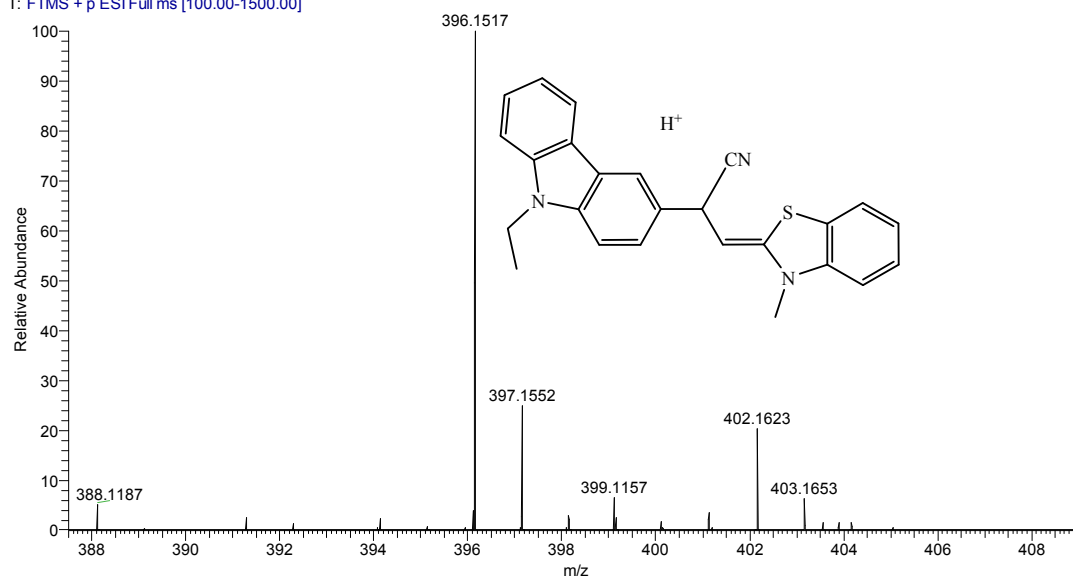

101

102 **Figures S2.** ESIMS analysis of **IECBT** in the present of **CN<sup>-</sup>**.

103

104

LYH-4\_150326133245 #321 RT: 3.35 AV: 1 NL: 8.50E8  
T: FTMS + p ESI Full ms [100.00-1500.00]

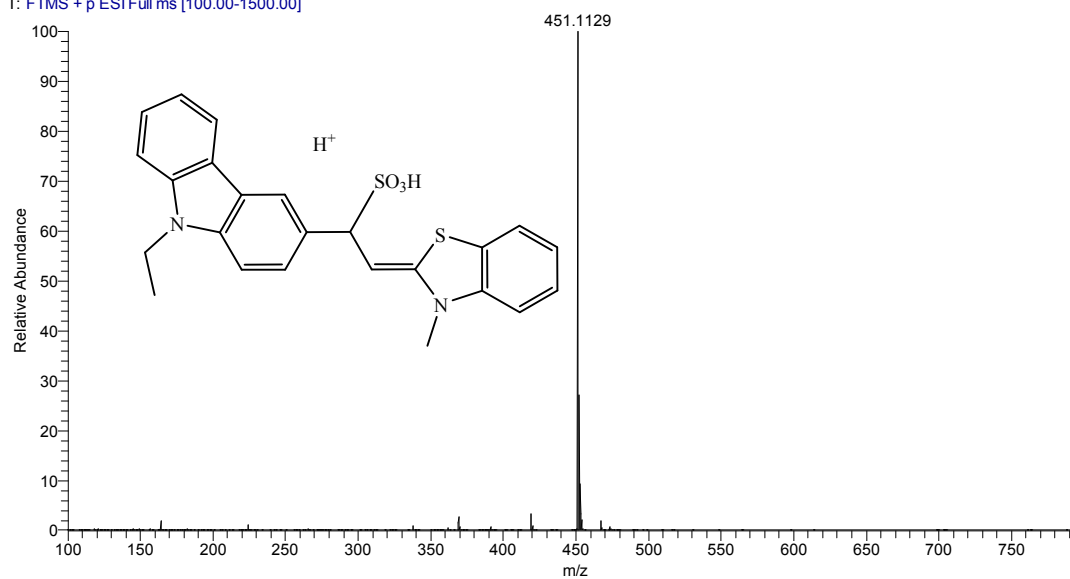

105

106 **Figures S3.** ESIMS analysis of **IECBT** in the present of **HSO<sub>3</sub><sup>-</sup>**.

107

108

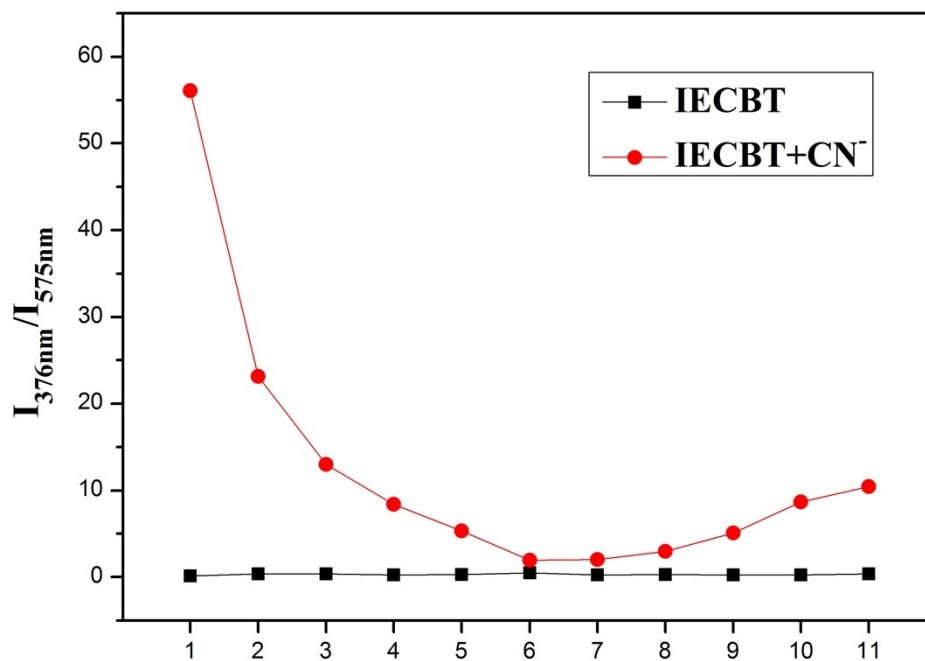

109

110 **Figures S4.** Emission ratio  $I_{376}/I_{575}$  changes of **IECBT** (10  $\mu$ M) in the absence or presence of CN<sup>-</sup>

111 (35  $\mu$ M) under different solvent conditions: (1) DMSO; (2) DMSO/H<sub>2</sub>O, v/v, 4/1; (3) DMSO/H<sub>2</sub>O,

112 v/v, 3/2; (4) DMSO/H<sub>2</sub>O, v/v, 2/3; (5) DMSO/H<sub>2</sub>O, v/v, 1/4; (6) H<sub>2</sub>O; (7) H<sub>2</sub>O/CH<sub>3</sub>CN, v/v, 4/1;

113 (8) H<sub>2</sub>O/CH<sub>3</sub>CN, v/v, 3/2; (9) H<sub>2</sub>O/CH<sub>3</sub>CN, v/v, 2/3; (10) H<sub>2</sub>O/CH<sub>3</sub>CN, v/v, 1/4; (11) CH<sub>3</sub>CN;  $\lambda_{ex}$

114 = 340 nm. Slits: 10 nm/5 nm. Voltage = 500 V.

115

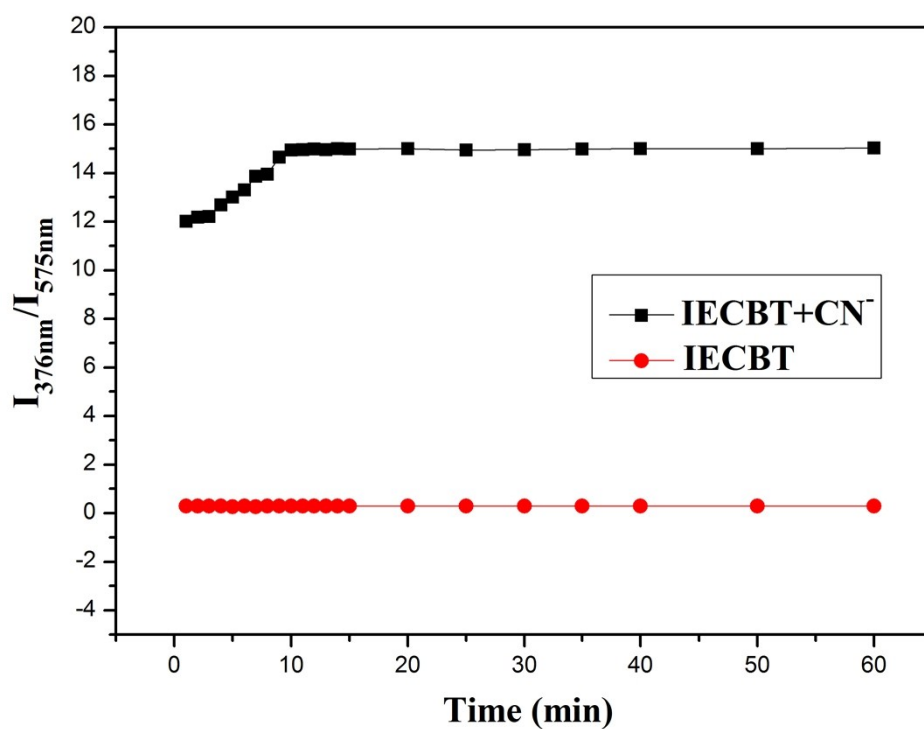

116

117 **Figures S5.** Time-depended fluorescent ratio  $I_{376}/I_{575}$  changes of **IECBT** (10  $\mu\text{M}$ ) in the absence

118 and present of  $\text{CN}^-$  (17  $\mu\text{M}$ ).  $\lambda_{\text{ex}} = 340 \text{ nm}$ . Slits: 10 nm/5 nm. Voltage = 500 V.

119



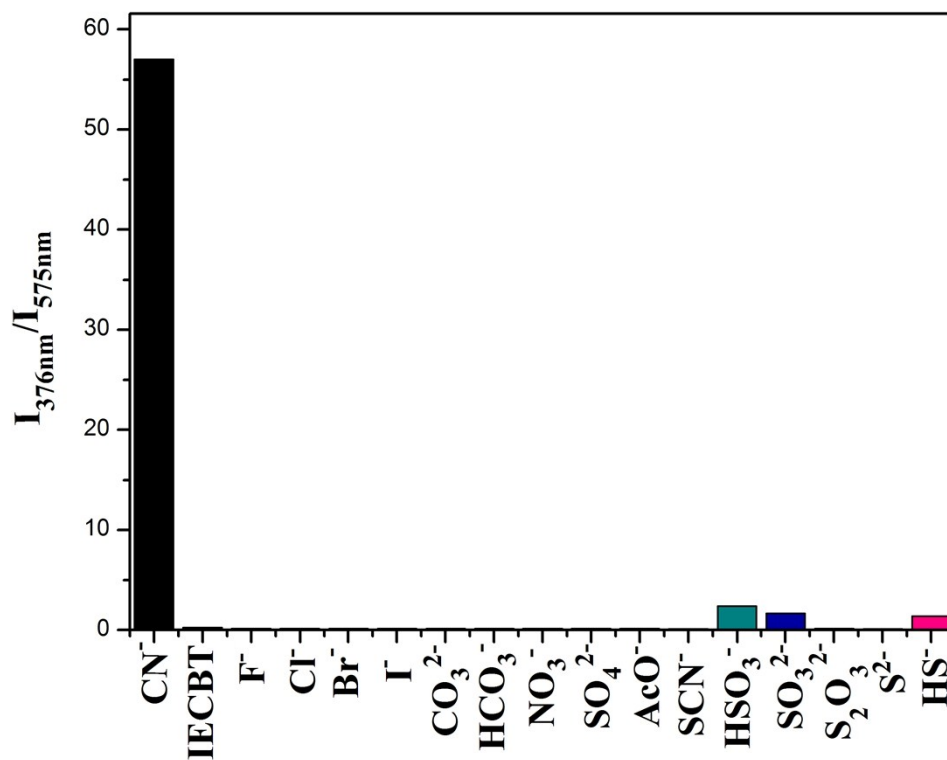

120

121 **Figures S6.** Emission ratio  $I_{376}/I_{575}$  of **IECBT** (10  $\mu$ M) in the presence of various anions (1 equiv.

122 respectively) in DMSO.  $\lambda_{ex}$  = 340 nm. Slits: 10 nm/5 nm. Voltage = 500 V.

123

124

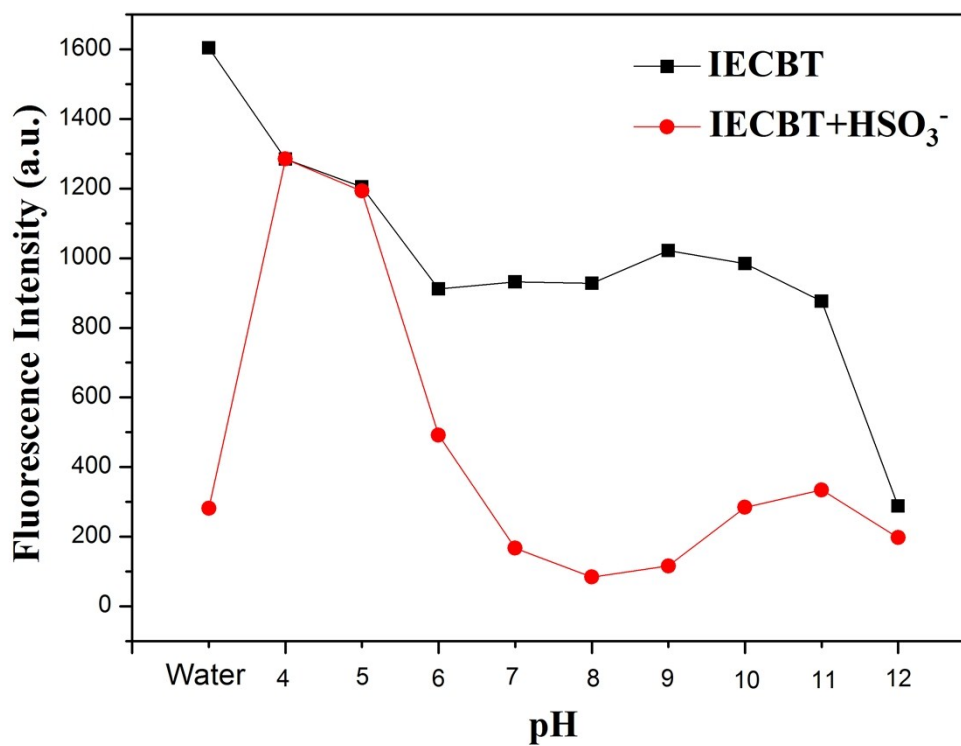

125

126 **Figures S7.** Changes in fluorescence spectra of **IECBT** (10  $\mu$ M) at 568 nm in the absence and

127 present of  $\text{HSO}_3^-$  (20  $\mu$ M) in water as a function of pH.  $\lambda_{\text{ex}} = 465$  nm. Slits: 10 nm/5 nm. Voltage =

128 600 V.

129

130

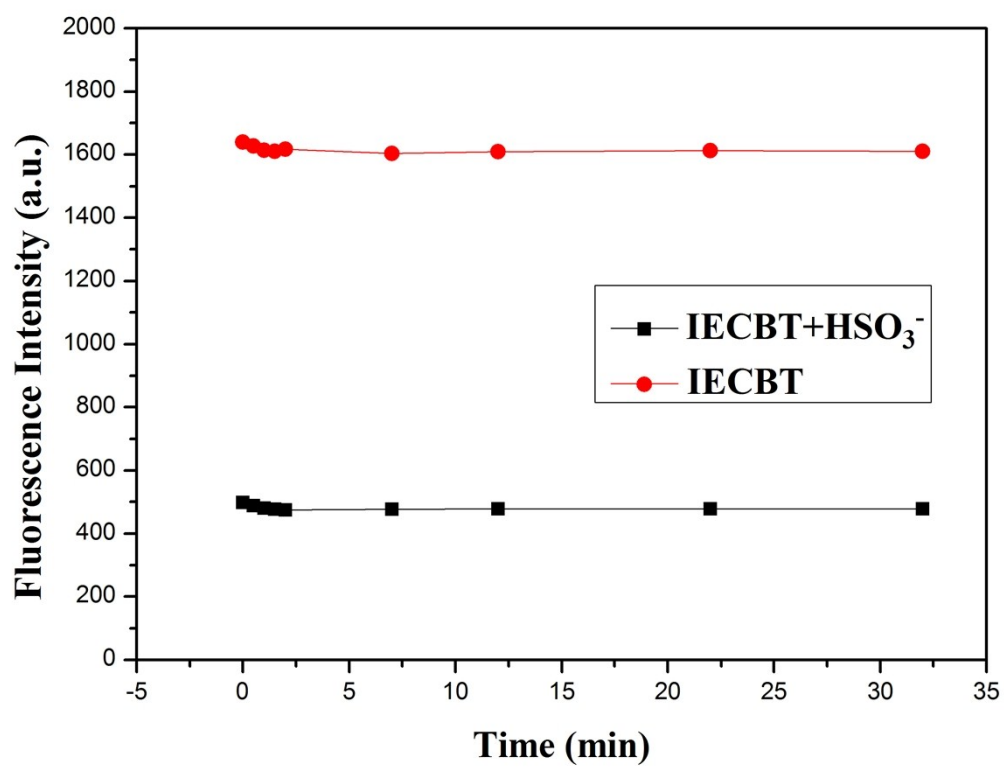

131

132 **Figures S8.** Time-depended fluorescent intensity changes at 568 nm of IECBT (10 μM) in the  
133 absence and present of HSO<sub>3</sub><sup>-</sup> (10μM). λ<sub>ex</sub> = 465 nm. Slits: 10 nm/5 nm. Voltage = 600 V.

134

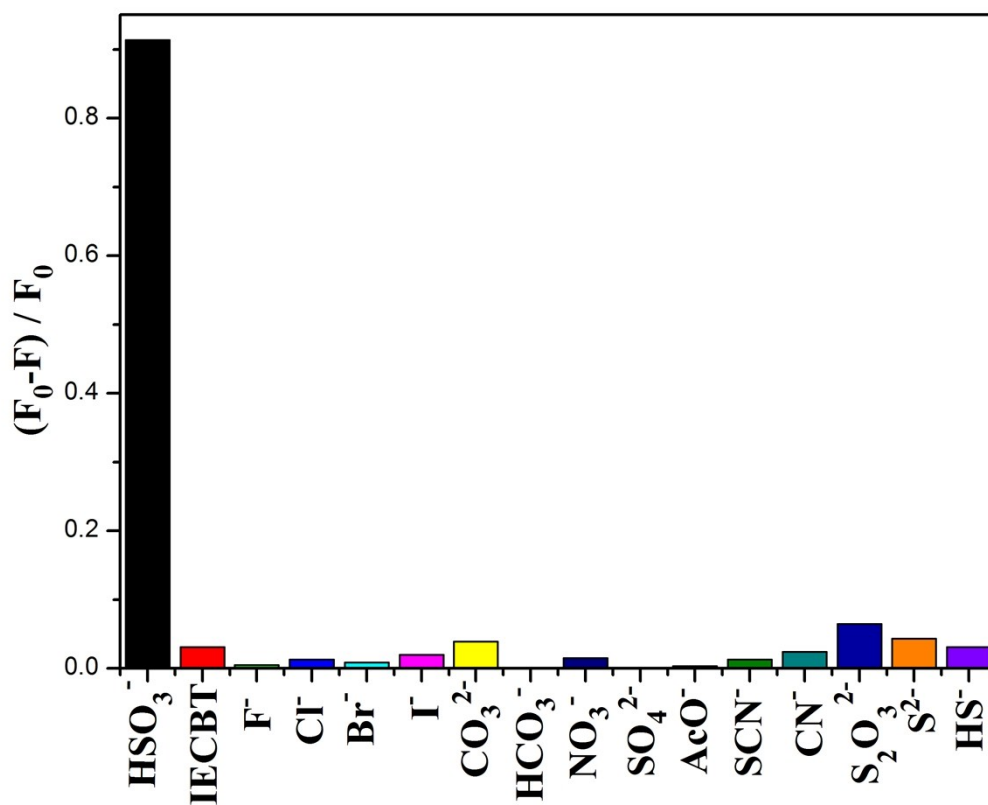

135

136 **Figures S9.** The relative fluorescence intensity ratio  $(F_0 - F) / F_0$  of IECBT (10  $\mu\text{M}$ ) at 568 nm in  
 137 the presence of various anions (1 equiv. respectively) in aqueous solution.  $\lambda_{\text{ex}} = 465$  nm. Slits: 10  
 138 nm/5 nm. Voltage = 600 V.

139

140

141

142

143

144

145

146

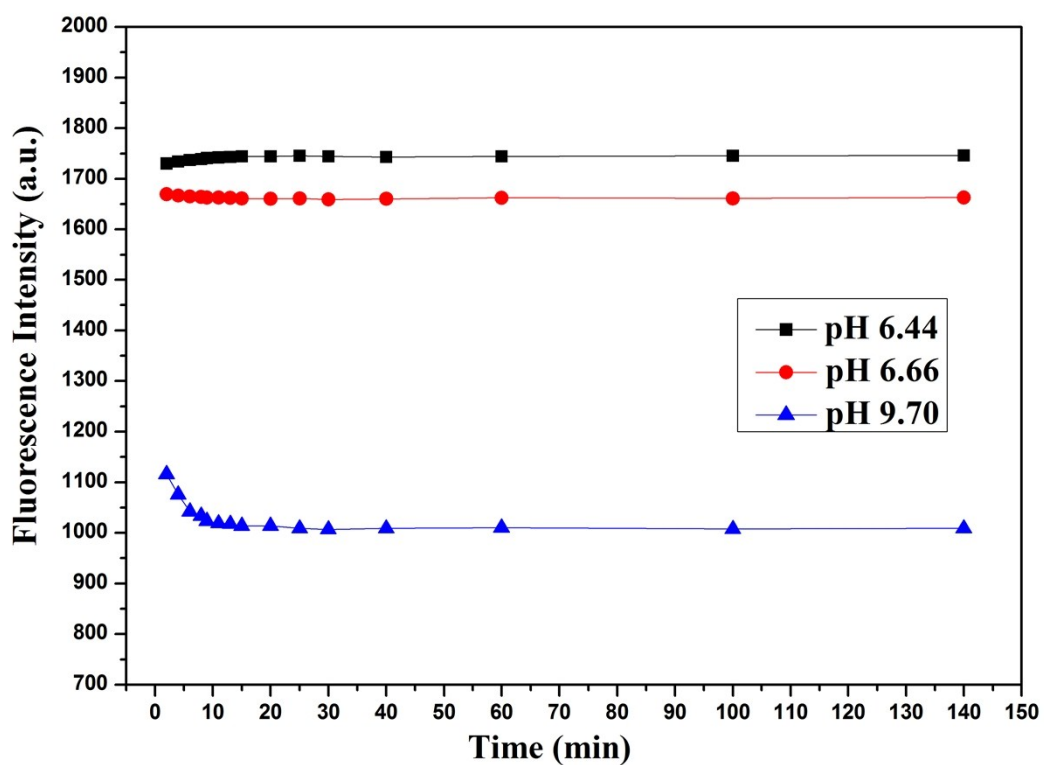

147

148 **Figures S10.** Time-depended fluorescent intensity changes at 568 nm of IECBT (10  $\mu$ M) at pH

149 6.44, 6.66, and 9.70, respectively.  $\lambda_{\text{ex}}$  = 465 nm. Slits: 10 nm/5 nm. Voltage = 600 V.

150

151

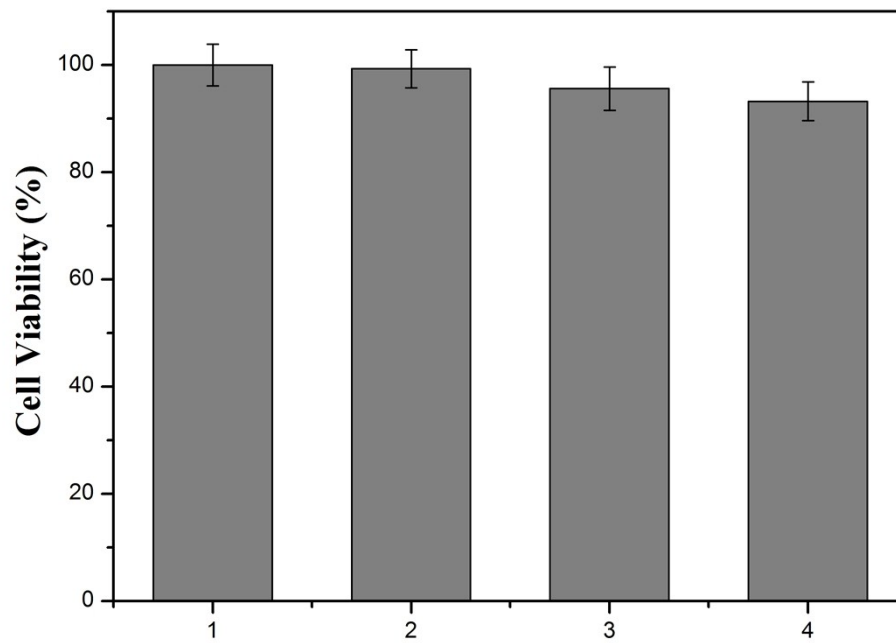

152

153 **Figures S11.** Cell cytotoxic effect of **IECBT** on Hela cells. (1) control; (2) 0.1  $\mu\text{M}$ ; (3) 1  $\mu\text{M}$ ; (4)  
154 10  $\mu\text{M}$ . Data are expressed as mean values standard error of the mean of six independent  
155 experiments.

156

157

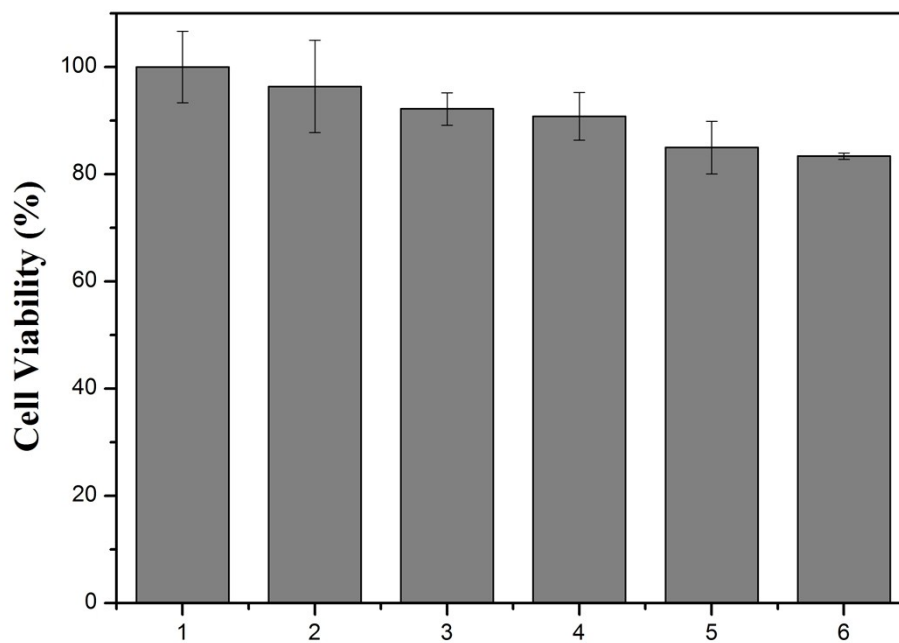

158

159 **Figures S12.** Cell cytotoxic effect of IECBT (10  $\mu\text{M}$ ) after upon addition of  $\text{CN}^-$  on HeLa cells.

160  $\text{CN}^-$  concentrations were varied as following: (1) control; (2) 0.01  $\mu\text{M}$ ; (3) 0.1  $\mu\text{M}$ ; (4) 1  $\mu\text{M}$ ; (5) 5

161  $\mu\text{M}$ ; (6) 30  $\mu\text{M}$ . Data are expressed as mean values standard error of the mean of six independent

162 experiments.
